# Supplementary material for: Thermostability and in vivo performance of AAV9 in a film matrix
Source: Springer Nature journal article supplement (doi:10.1038/s43856-022-00212-6), 2022-11-21
Supplement: MOESM3 [file 43856_2022_212_MOESM3_ESM.pdf]

## **Description of Additional Supplementary Files**

**File Name:** Supplementary Data 1

**Description:** Compiled Excel File with Source data for all figures and Supplemental Figures

**File Name:** Supplementary Data 2

**Description:** Supplementary Image Files
